# Supplementary material
Source: Springer Nature journal article supplement (https://www.springermedizin.de/resource/supplementary/12960_2004_28_MOESM3_ESM.pdf/9570244)
Supplement: MOESM3 [file 9570244]

**CENTRAL  
LEVEL/  
INSPECTION  
INSTITUTIONAL  
PARTNERS /  
NGO-DONORS**

Planning  
Coordination  
Programme/Reform  
Standard  
Evaluation  
Organizational  
learning

**"LEARNING  
DISTRICT"  
STUDENTS**

Competency-  
based approach  
Improvement of  
practice  
Improvement of  
learning

**TEACHERS/  
TUTORS**

Active  
pedagogy  
Methods  
Teaching  
Committee

**HEALTH  
PERSONNEL - Update  
Teaching role**

**SCHOOL  
DIRECTORS  
Management  
Competences  
Teaching role**

**POPULATION  
Patient  
Non-patient  
Education  
Health promotion**
